# Supplementary material for: Multiplex PCR assays developed for neglected pathogen detection in undifferentiated acute febrile illness cases in tropical regions
Source: PubMed Central journal article supplement (PMC11520662; doi:10.1590/0074-02760240053), 2024-10-28
Supplement: 1678-8060-mioc-119-e240053-s.pdf [file 1678-8060-mioc-119-e240053-s.pdf]

TABLE I  
Table showing reference sequences of bacterial species used for plasmid synthesis in this study

| Plasmid | Target                 | Sequence included in the plasmid synthesized                                                                                                                                                                                                                                                                                                                                                                                                                                                                                                                                                                                                                                                                                                                                                                                                                                                                                                                                                                                                                                                                                                                                                                                                                                                                                                                                                                                                                                                                                                                                                                                                                                                                                                                                                                                                                                                                                                                                                                                                                                                                                                                                                                             | Length (bp) | Target gene and position (bp)  | Target reference sequence |
|---------|------------------------|--------------------------------------------------------------------------------------------------------------------------------------------------------------------------------------------------------------------------------------------------------------------------------------------------------------------------------------------------------------------------------------------------------------------------------------------------------------------------------------------------------------------------------------------------------------------------------------------------------------------------------------------------------------------------------------------------------------------------------------------------------------------------------------------------------------------------------------------------------------------------------------------------------------------------------------------------------------------------------------------------------------------------------------------------------------------------------------------------------------------------------------------------------------------------------------------------------------------------------------------------------------------------------------------------------------------------------------------------------------------------------------------------------------------------------------------------------------------------------------------------------------------------------------------------------------------------------------------------------------------------------------------------------------------------------------------------------------------------------------------------------------------------------------------------------------------------------------------------------------------------------------------------------------------------------------------------------------------------------------------------------------------------------------------------------------------------------------------------------------------------------------------------------------------------------------------------------------------------|-------------|--------------------------------|---------------------------|
| A       | <i>Leptospira</i> spp. | GGTTGCGCAAATTACCCAATCCTGCACAGGGAGGTAGTG<br>ACAAGAAATAACAATACAGGGCTTATAGTCTTGTAATTGGA<br>ATGATGGGGATATAAATCCTTCCCAGAGTACCAATTGGAG<br>GGCAAAGTCTGGAGGGTCAGATACCGTCGTAGTCCTAACCA<br>TAAACTATCATCAAGTGATTTCGATCATACGAGACATTA<br>CTGAGTACCCGCATTACAAGCCGGCTAGAGATAACCCGGG<br>AACTTGATAAGTTCTGTAACGCCTATTTGATCTTGCTCTTG<br>GTGGGGTTTACCATGCGTAATTTGTTACCAACTTACCGGT<br>GCGCTCTTATCTGAAGATGCAGTTGGTTGACTGCTGGTC<br>CTAAGGGCCTCACTGTAGCGATTAGTAAGCCTTATGGGTC<br>ACCAGAGATCACAAAGGATGGCTACAAGGTAATGAAGAGT<br>ATAAAGCCTGAAGAACCCTGGCTGCCGCTATAGCGAGCA<br>TCATTACTCAGAGTGCTTCTCAGTGTAATATGGTATGCAGT<br>TTGATCGCGGATATCTTTCGCCTTACTTTGTTACAAATGCT<br>GAAAAAATGCTGGTGAATTTGAAAAATCCATACATATTCTT<br>TACTGAAAAAGAAGATTAATCTTGTACAAAGCATTTTACCAA<br>TATTAGAAAAACGTTGCGAGAGCTGGCAGACCATTGCTCAT<br>CATAGCTGAAGATGTTGAAGGTGAAGCTCTTAAGGTACCT<br>ACAGAAGAAGTCCCAGGCAAACCTCTGTGCCAGCAGCCGG<br>GTAATACGGAGGGGGCAAGCGTTGTTTCGGAATTATTGGG<br>CGTAAAGGGCACGTAGTGGACTAGTAAGTTAAAAGTGAAA<br>TACCAAAGCTTAACTTTGGAGCGGCTTTAATACTGCTAGA<br>CTAGAGGTCGAAAGAGGATAGCGGAATTCCTAGTGTA<br>GGTGA AATTCGTAGATATTAGGAGGAACACCAGTTGCGAA<br>GGCGGCTATCTGGTTCGATACTGACACTGAGGTGCGAAAG<br>CGTGGGGGAGCAAACAGGATTAGATACCCTGGTAGTCCA<br>CGCTGTAAACGATGAGTGCTAAAAGATACATGAGCAAAT<br>CTCAACTTTATTAGAAGAGAAGCATTATTAGATAAAAAAGC<br>CAATGCATGCTTTTACAGTATGAAAAATTGGTGATTTATAAT<br>AACTTAGCAAATCGTAAAGTGAAAAACAGACGATAAATCATT<br>CAAGTTTCTGACCTATCAGCTTTCGAGTATCTTGGTATGTA<br>TTTAGCAATGATGTCTTTGAAGTGTTTTTACTTTATTGTA<br>ATAAAGCATATTCAGGACTTTTACTTTGAGAAAAATTAGAGT<br>GTTTCTAGCAGGCCGACGCTTTGAATACTGCAGCATGGAA<br>TATAAGTTTTCGGGAGGCAGCAGTTAAGAATCTTGCTCAA<br>TGGGGCAACCCTGAAGCAGCGACGCGCGGTGAACGAAG<br>AAGGTCTTCGGATTGTAAGTTCAGTAAGCAGGGAAAAAAT<br>AAGCAGCAATGTGATGATGTTACCTGCCTAAAGCACCGGC<br>TAACTACGTGCCAGCAGCGCGGTAATACGTATGGTGCAA<br>GCGTTGTTTTCGGTCTTTGTGGGCGGCTATCCGACGGGCGC<br>AATCTCGGAACTGGCCATCTCGAACGGCCATGCTGAAGAG<br>CTTGAATGCAGCCTGCAAAAAATTAACACACCAGCATCAC<br>CTAACTGGAGTA ACTGGAGCTCACTAACTGGAGCACAAGC<br>TTCATGGACATTTGAGAGTTCAAGTAGGTGCAAAATCAAGAT<br>GAAGCAATTGCTGTACCAATGATGCATTTGAAAGCTTGGC<br>ATTGCTGGCAAATTGGCAGATTGGCAGATTGTGCGTCTA<br>AAGTGGCAGATTGTGCGCTAAAGCGTCTAAAAACCCGGC<br>TGAGAGGGAGATTTATATTGTAGAGGGTGATTCTGCTGGA<br>GGAAGTGCTAAAATGA | 1947        | 16S ribosomal RNA (1382- 1578) | MN062732.1                |
|         | <i>Brucella</i> spp.   | TCATTCATTAGTGAATGAAAGATTACACTATTTATTCAAAC<br>CTTTTGTAGCTCTTCTCATCCTATGGCTATTATGCTTGGCG<br>CTGTCGGTTCTCTTTCGGCATTATTCCTGATTTATTGAATT<br>TTAAGGAAGCAGATTACGA ACTTACTGCTATTAGAATGATT<br>GCTAAGATACCTACCATCGCCGGAATTGGACCTTGATAC<br>CCCAAATCATTATTAATGGGCAAATCACAGGTCTTATAAGT<br>TTAGCTCATAAATATAACATGCAGGTTTATCCTTACACGTT<br>TAGAATTGATGCATTGCCTTCATATGTACTGGCTTACCAGC<br>TATGGTAATAAATGGACAATGAAATAA ACTCATTGGACCC<br>GGGGGCGGTAGCGGAAGCACGTCTCGCTGCTTAAATGTAG<br>TGTAATGTTTCAA ACTAAGCCTTAAATCGTGCAGATTTA<br>AGCGGGTTCGAAGGCACCTGGCAACAGAAGCCTTCACTTG                                                                                                                                                                                                                                                                                                                                                                                                                                                                                                                                                                                                                                                                                                                                                                                                                                                                                                                                                                                                                                                                                                                                                                                                                                                                                                                                                                                                                                                                                                                                                                                                                                                                     | 1947        | BL chromosome 1 (1603- 1637)   | CP022875.1                |
| B       | <i>Rickettsia</i> spp. | TCATTCATTAGTGAATGAAAGATTACACTATTTATTCAAAC<br>CTTTTGTAGCTCTTCTCATCCTATGGCTATTATGCTTGGCG<br>CTGTCGGTTCTCTTTCGGCATTATTCCTGATTTATTGAATT<br>TTAAGGAAGCAGATTACGA ACTTACTGCTATTAGAATGATT<br>GCTAAGATACCTACCATCGCCGGAATTGGACCTTGATAC<br>CCCAAATCATTATTAATGGGCAAATCACAGGTCTTATAAGT<br>TTAGCTCATAAATATAACATGCAGGTTTATCCTTACACGTT<br>TAGAATTGATGCATTGCCTTCATATGTACTGGCTTACCAGC<br>TATGGTAATAAATGGACAATGAAATAA ACTCATTGGACCC<br>GGGGGCGGTAGCGGAAGCACGTCTCGCTGCTTAAATGTAG<br>TGTAATGTTTCAA ACTAAGCCTTAAATCGTGCAGATTTA<br>AGCGGGTTCGAAGGCACCTGGCAACAGAAGCCTTCACTTG                                                                                                                                                                                                                                                                                                                                                                                                                                                                                                                                                                                                                                                                                                                                                                                                                                                                                                                                                                                                                                                                                                                                                                                                                                                                                                                                                                                                                                                                                                                                                                                                                                                                     | 493         | gltA (11-176)                  | CP004889.1                |
|         | <i>Borrelia</i> spp.   | TCATTCATTAGTGAATGAAAGATTACACTATTTATTCAAAC<br>CTTTTGTAGCTCTTCTCATCCTATGGCTATTATGCTTGGCG<br>CTGTCGGTTCTCTTTCGGCATTATTCCTGATTTATTGAATT<br>TTAAGGAAGCAGATTACGA ACTTACTGCTATTAGAATGATT<br>GCTAAGATACCTACCATCGCCGGAATTGGACCTTGATAC<br>CCCAAATCATTATTAATGGGCAAATCACAGGTCTTATAAGT<br>TTAGCTCATAAATATAACATGCAGGTTTATCCTTACACGTT<br>TAGAATTGATGCATTGCCTTCATATGTACTGGCTTACCAGC<br>TATGGTAATAAATGGACAATGAAATAA ACTCATTGGACCC<br>GGGGGCGGTAGCGGAAGCACGTCTCGCTGCTTAAATGTAG<br>TGTAATGTTTCAA ACTAAGCCTTAAATCGTGCAGATTTA<br>AGCGGGTTCGAAGGCACCTGGCAACAGAAGCCTTCACTTG                                                                                                                                                                                                                                                                                                                                                                                                                                                                                                                                                                                                                                                                                                                                                                                                                                                                                                                                                                                                                                                                                                                                                                                                                                                                                                                                                                                                                                                                                                                                                                                                                                                                     | 493         | glpQ (197- 306)                | CP000993.1                |
| C       | <i>Bartonella</i> spp. | TGATTATGAGTGACAGCGTACCTTTTGCATAATGGGTCAG<br>CGAGTTAATCTGTGAGCAAGCTTAAGCCGTGTTAAGTTA<br>ACGGATTAGACCCGAAACCAAGTGATCTAGCCATGGCCAG<br>GTTGAAGGTGTAGTAAAGTACATTGGAGGACCGAACCTGT<br>TACTGTTGCAATAATGACAGGTTGGTAGGTCGTAATCC<br>CGGTACCTTGGTAGCCACTATAGTTGGGCTTAAAGAGAA<br>GAAGATTCCTCTTGTGCTGCGGCGAGACCGCGCACGGT<br>CCACAGGTTTGACCAATAGGGTACAGGGAAGGACCCTG<br>GACCCTGCCCTTCCCGGTGGGGTGGGAAATGCATGGGGC<br>CACCCAGCTCCGCGCGGCGCTCAGATTAATAGCTCTTCT<br>TGATTTCTTGGATGGTGATGCATGGCCGTTTTTAGTTCGTG<br>AATATGATTTGTCTGGTTAATCCGATAACGAACGAGATCT<br>TAACCTGCTAATTAGCGGT                                                                                                                                                                                                                                                                                                                                                                                                                                                                                                                                                                                                                                                                                                                                                                                                                                                                                                                                                                                                                                                                                                                                                                                                                                                                                                                                                                                                                                                                                                                                                                                                                                                               | 499         | G1712 chromosome (328- 481)    | CP091505.1                |
|         | <i>Anaplasma</i> spp.  | TGATTATGAGTGACAGCGTACCTTTTGCATAATGGGTCAG<br>CGAGTTAATCTGTGAGCAAGCTTAAGCCGTGTTAAGTTA<br>ACGGATTAGACCCGAAACCAAGTGATCTAGCCATGGCCAG<br>GTTGAAGGTGTAGTAAAGTACATTGGAGGACCGAACCTGT<br>TACTGTTGCAATAATGACAGGTTGGTAGGTCGTAATCC<br>CGGTACCTTGGTAGCCACTATAGTTGGGCTTAAAGAGAA<br>GAAGATTCCTCTTGTGCTGCGGCGAGACCGCGCACGGT<br>CCACAGGTTTGACCAATAGGGTACAGGGAAGGACCCTG<br>GACCCTGCCCTTCCCGGTGGGGTGGGAAATGCATGGGGC<br>CACCCAGCTCCGCGCGGCGCTCAGATTAATAGCTCTTCT<br>TGATTTCTTGGATGGTGATGCATGGCCGTTTTTAGTTCGTG<br>AATATGATTTGTCTGGTTAATCCGATAACGAACGAGATCT<br>TAACCTGCTAATTAGCGGT                                                                                                                                                                                                                                                                                                                                                                                                                                                                                                                                                                                                                                                                                                                                                                                                                                                                                                                                                                                                                                                                                                                                                                                                                                                                                                                                                                                                                                                                                                                                                                                                                                                               | 499         | 23S ribosomal RNA (11- 164)    | NR_076399.1               |

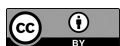

TABLE II

Table showing sequences of primers and probes used in this study, as well as conditions for multiplex PCR assays

| Assay | Cycling conditions                                            | Target                 | Description | Final concentration | Sequence 5' - 3'              | Reference |
|-------|---------------------------------------------------------------|------------------------|-------------|---------------------|-------------------------------|-----------|
| 1     | 95°C for 3 min; 40 cycles of 95°C for 15 s and 50°C for 40 s. | <i>Leptospira</i> spp. | Forward     | 0.22 µM             | CGGGAGGCAGCAGTTAAGAA          | (1)       |
|       |                                                               |                        | Reverse     | 0.22 µM             | AACAACGCTTGACCATACG           |           |
|       |                                                               |                        | Probe       | 0.22 µM             | FAM-TGAAGCAGCGACGCCGCGTG      |           |
|       |                                                               | <i>Rickettsia</i> spp. | Forward     | 0.22 µM             | GTGAATGAAAGATTACACTATTTAT     | (2)       |
|       |                                                               |                        | Reverse     | 0.22 µM             | GTATCTTAGCAATCATTCTAATAGC     |           |
|       |                                                               |                        | Probe       | 0.22 µM             | CY5-CTATTATGCTTGCRGCTGTYGGTTC |           |
|       |                                                               | <i>Borrelia</i> spp.   | Forward     | 0.22 µM             | CCTTGATACCCCAAATYAT           | (2)       |
|       |                                                               |                        | Reverse     | 0.22 µM             | GGYAATGMRTCAATTCTAAA          |           |
|       |                                                               |                        | Probe       | 0.22 µM             | HEX-ATGGRSAAATSACAGGTCTTA     |           |
| 2     | 95°C for 3 min; 40 cycles of 95°C for 15 s and 60°C for 40 s. | <i>Anaplasma</i> spp.  | Forward     | 0.3 µM              | TGACAGCGTACCTTTTGCAT          | (2)       |
|       |                                                               |                        | Reverse     | 0.3 µM              | GTAACAGGTTCCGGTCTCCA          |           |
|       |                                                               |                        | Probe       | 0.15 µM             | CY5-GGATTAGACCCGAAACCAAG      |           |
|       |                                                               | <i>Brucella</i> spp.   | Forward     | 0.4 µM              | TCTTTGTGGGCGGCTATCC           | (3)       |
|       |                                                               |                        | Reverse     | 0.4 µM              | CCGTTTCGAGATGGCCAGTT          |           |
|       |                                                               |                        | Probe       | 0.2 µM              | FAM-ACGGGCGCAATCT             |           |
|       |                                                               | <i>Bartonella</i> spp. | Forward     | 0.4 µM              | GCTATGGTAATAAATGGACAATGAAATAA | (3)       |
|       |                                                               |                        | Reverse     | 0.4 µM              | GCTTCTGTTGCCAGGTG             |           |
|       |                                                               |                        | Probe       | 0.2 µM              | HEX-CGTCGCAGRTYTAAGCGGGGT     |           |

TABLE III

Table showing a matrix of in-silico analysis of the primer's specificity in this study. Results are shown as the number of target hits after primer-BLAST analysis

| Targets                | Number of hits (percentage) against the target |                        |                        |                      |                       |                        |                      | Specificity |
|------------------------|------------------------------------------------|------------------------|------------------------|----------------------|-----------------------|------------------------|----------------------|-------------|
|                        | Total                                          | <i>Leptospira</i> spp. | <i>Rickettsia</i> spp. | <i>Borrelia</i> spp. | <i>Anaplasma</i> spp. | <i>Bartonella</i> spp. | <i>Brucella</i> spp. |             |
| <i>Leptospira</i> spp. | 71                                             | 71 (100%)              | 0                      | 0                    | 0                     | 0                      | 0                    | 100%        |
| <i>Rickettsia</i> spp. | 18                                             | 0                      | 18 (100%)              | 0                    | 0                     | 0                      | 0                    | 100%        |
| <i>Borrelia</i> spp.   | 12                                             | 0                      | 0                      | 12 (100%)            | 0                     | 0                      | 0                    | 100%        |
| <i>Anaplasma</i> spp.  | 12                                             | 0                      | 0                      | 0                    | 12 (100%)             | 0                      | 0                    | 100%        |
| <i>Bartonella</i> sp   | 23                                             | 0                      | 0                      | 0                    | 0                     | 23 (100%)              | 0                    | 100%        |
| <i>Brucella</i> sp     | 8                                              | 0                      | 0                      | 0                    | 0                     | 0                      | 8 (100%)             | 100%        |

TABLE IV  
Table showing inter and intra-assay variations for molecular detection of bacteria in singleplex and multiplex formats in this study

| Assay configuration |                  | Bacterial species      |                   |                        |                   |                      |                   |                       |                   |                      |                   |                        |                   |
|---------------------|------------------|------------------------|-------------------|------------------------|-------------------|----------------------|-------------------|-----------------------|-------------------|----------------------|-------------------|------------------------|-------------------|
|                     |                  | <i>Leptospira</i> spp. |                   | <i>Rickettsia</i> spp. |                   | <i>Borrelia</i> spp. |                   | <i>Anaplasma</i> spp. |                   | <i>Brucella</i> spp. |                   | <i>Bartonella</i> spp. |                   |
|                     |                  | Dilution               | Intra-assay CV(%) | Inter-assay CV(%)      | Intra-assay CV(%) | Inter-assay CV(%)    | Intra-assay CV(%) | Inter-assay CV(%)     | Intra-assay CV(%) | Inter-assay CV(%)    | Intra-assay CV(%) | Inter-assay CV(%)      | Intra-assay CV(%) |
| Singleplex          | 10 <sup>-1</sup> | 2.56                   | 0.27              | 0.35                   | 0.57              | 3.82                 | 0.25              | 2.31                  | 0.56              | 0.75                 | 0.31              | 2.8                    | 1.42              |
|                     | 10 <sup>-2</sup> | 0.51                   | 0.36              | 1                      | 0.2               | 2.41                 | 0.33              | 4.56                  | 0.88              | 0.54                 | 1.4               | 0.69                   | 1.76              |
|                     | 10 <sup>-3</sup> | 0.6                    | 1.31              | 0.54                   | 1.58              | 0.54                 | 1                 | 0.39                  | 2.21              | 0.88                 | 3.03              | 0.5                    | 0.19              |
|                     | 10 <sup>-4</sup> | 0.66                   | 0.96              | 0.86                   | 0.07              | 0.89                 | 0.85              | 0.71                  | 0.72              | 0.05                 | 0.52              | 0.15                   | 1.03              |
|                     | 10 <sup>-5</sup> | 1.54                   | 0.77              | 0.69                   | 3.39              | 0.63                 | 1.16              | 0.13                  | 0.51              | 0.45                 | 0.77              | 0.81                   | 1.69              |
|                     | 10 <sup>-6</sup> | 0.5                    | 0.07              | 0.25                   | 0.43              | 0.53                 | 1.2               | 0.3                   | 1.11              | 0.62                 | 0.35              | 0.62                   | 0.18              |
|                     | 10 <sup>-7</sup> | 1.33                   | 0.44              | 0.94                   | 1.48              | 1.18                 | 0.06              | 2                     | 1.82              | 1.41                 | 1.94              | 1.34                   | 1.14              |
|                     | 10 <sup>-8</sup> | -                      | -                 | 1.98                   | 0.22              | -                    | -                 | 1.11                  | 1.22              | -                    | -                 | 0.83                   | 0.65              |
| Multiplex           | 10 <sup>-1</sup> | 2.09                   | 0.45              | 1.16                   | 0.3               | 4.77                 | 0.23              | 0.71                  | 1.57              | 1.67                 | 5.53              | 2.54                   | 2.65              |
|                     | 10 <sup>-2</sup> | 0.63                   | 1.76              | 1.14                   | 0.24              | 1.41                 | 2.84              | 0.84                  | 0.63              | 4.91                 | 1.03              | 4.4                    | 2.92              |
|                     | 10 <sup>-3</sup> | 0.22                   | 2.57              | 0.17                   | 0.1               | 0.05                 | 2.71              | 0.53                  | 0.72              | 0.1                  | 6.27              | 3.12                   | 0.62              |
|                     | 10 <sup>-4</sup> | 0.52                   | 2.14              | 0.34                   | 0.38              | 0.21                 | 1.26              | 0.35                  | 0.69              | 0.94                 | 1.87              | 3.71                   | 2.01              |
|                     | 10 <sup>-5</sup> | 1.68                   | 0.99              | 1.19                   | 0.5               | 0.99                 | 1.24              | 0.06                  | 0.65              | 0.45                 | 2.07              | 1.89                   | 0.92              |
|                     | 10 <sup>-6</sup> | 0.76                   | 1.26              | 1.01                   | 0.53              | 0.74                 | 1.2               | 0.52                  | 0.45              | 0.39                 | 2.09              | 2.54                   | 0.87              |
|                     | 10 <sup>-7</sup> | 1.65                   | 1.93              | 1.19                   | 1.09              | 1.2                  | 0.56              | 0.47                  | 1.4               | 0.58                 | 2.23              | 0.89                   | 1.87              |
|                     | 10 <sup>-8</sup> | 8.71                   | 0.08              | 0.91                   | 1.39              | 1.21                 | 1.27              | -                     | -                 | -                    | -                 | -                      | -                 |

REFERENCES

1. Waggoner JJ, Abeynayake J, Balassiano I, Lefterova M, Sahoo MK, Liu Y, et al. Multiplex nucleic acid amplification test for diagnosis of dengue fever, malaria, and leptospirosis. *J Clin Microbiol.* 2014; 52(6): 2011-8.
2. Dahmana H, Granjon L, Diagne C, Davoust B, Fenollar F, Mediannikov O. Rodents as hosts of pathogens and related zoonotic disease risk. *Pathogens.* 2020; 9(3): 202.
3. Bounaadja L, Albert D, Chénais B, Hénault S, Zygmunt MS, Poliak S, et al. Real-time PCR for identification of *Brucella* spp.: a comparative study of IS711, bcs31 and per target genes. *Vet Microbiol.* 2009; 137(1-2): 156-64.
